# Supplementary material for: Highly selective and sensitive fluorescence probe based on thymine-modified carbon dots for Hg2+ and l-cysteine detection
Source: Royal Society of Chemistry journal article supplement (doi:10.1039/c5ra18432k), 2015-01-01
Supplement: c5ra18432k1.pdf [file c5ra18432k1.pdf]

## Supporting Information

### Highly Selective and Sensitive Fluorescence Probe Based on Thymine-modified Carbon Dots for Hg<sup>2+</sup> and L-Cysteine Detection

Hui Xu <sup>a</sup>, Shanshan Huang <sup>a</sup>, Caiyun Liao <sup>a</sup>, Yang Li <sup>a</sup>, Baozhan Zheng <sup>a</sup>, Juan Du <sup>\*a</sup> and Dan Xiao <sup>\*a,b</sup>

<sup>a</sup> College of Chemistry, Sichuan University, Chengdu 610064, PR China

<sup>b</sup> College of Chemical Engineering, Sichuan University, Chengdu 610065, PR China

E-mail: [xiaodan@scu.edu.cn](mailto:xiaodan@scu.edu.cn);

E-mail: [lxdj@vip.sina.com](mailto:lxdj@vip.sina.com);

Fax: +86-28-85416029; Tel: +86-28-85415029

#### Figures

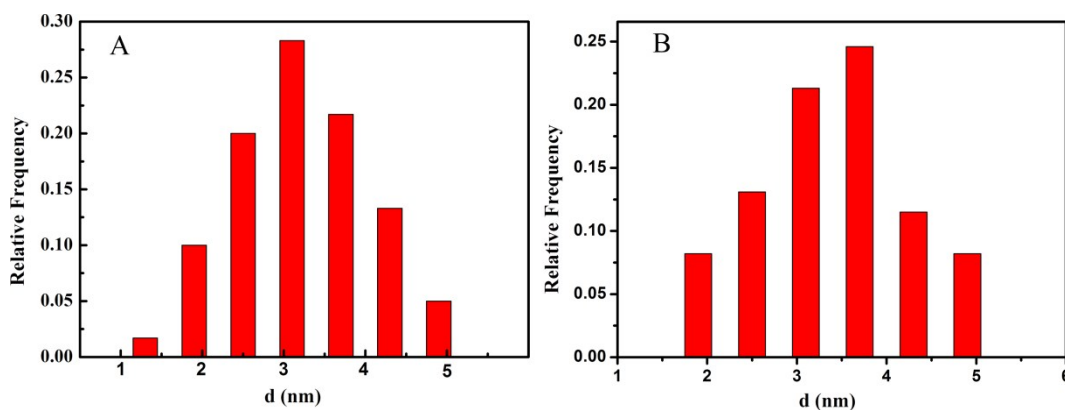

Fig. S1. The size distribution of CDs (A) and CDs-T (B).

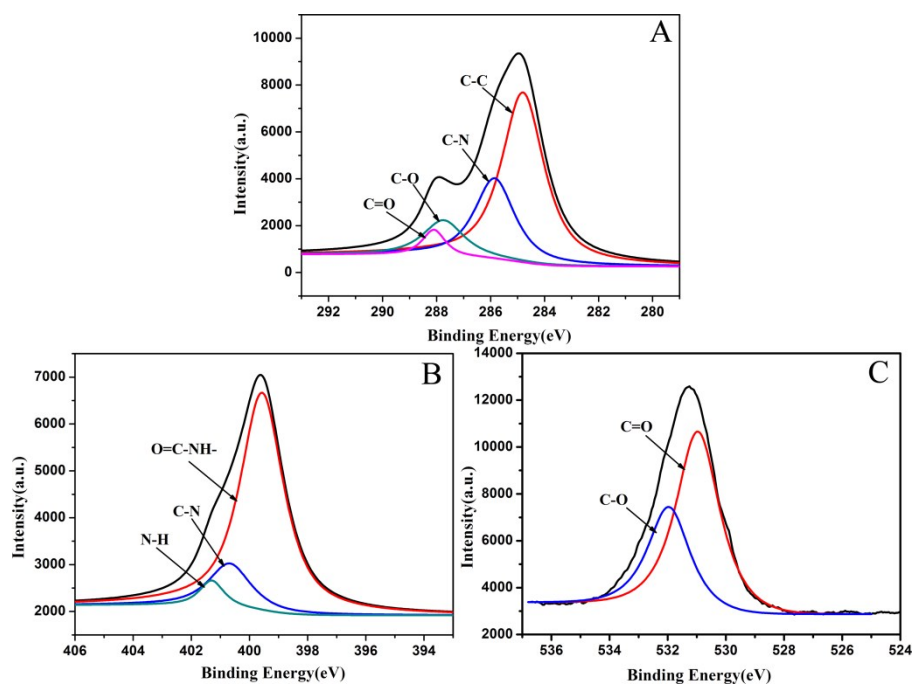

Fig. S2. The high-resolution XPS spectra of CDs-T C<sub>1s</sub> (A), N<sub>1s</sub> (B), and O<sub>1s</sub> (C).

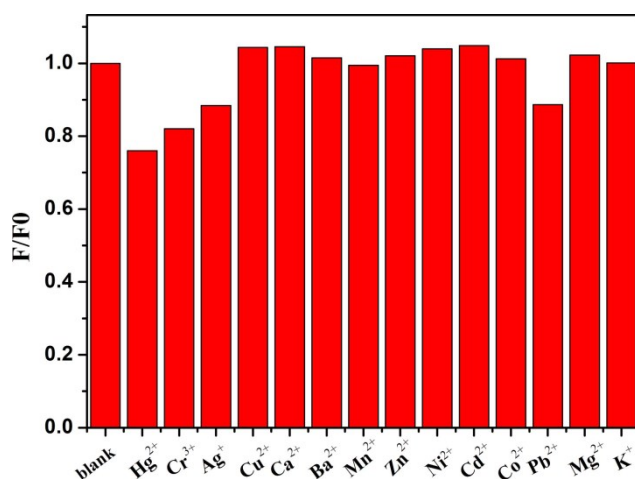

**Fig. S3.** Fluorescence intensity ratio for CDs (10 µg·mL<sup>-1</sup>) in the presence of 20 µM different metal ions.

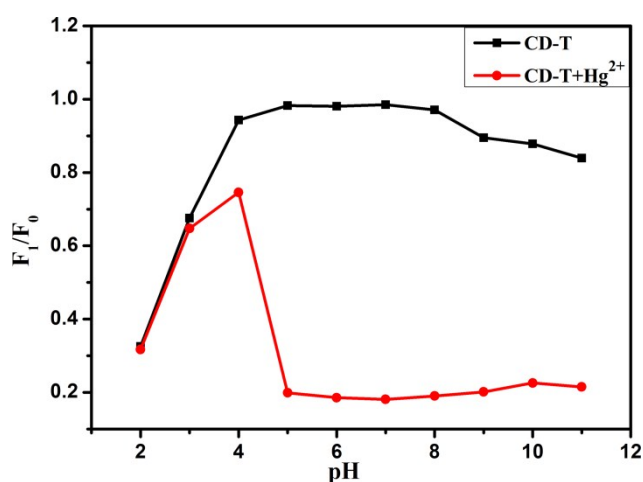

**Fig. S4.** Fluorescence intensity ratio of the CDs-T (10 µg·mL<sup>-1</sup>) in the absence and in the presence of Hg<sup>2+</sup> (20 µM) as a function of pH ( $\lambda_{\text{ex}} = 360$  nm).

**Table S1.** Comparison of different nanoparticles-based methods for the detection of Hg<sup>2+</sup>.

| Method                                         | Linear range  | Detect limit | Reference      |
|------------------------------------------------|---------------|--------------|----------------|
| Mononucleotides-stabilized gold nanoparticles  | 0.02-6.0 µM   | 50 nM        | S <sup>1</sup> |
| Carbon nanodots                                | 0-3 µM        | 4.2 nM       | S <sup>2</sup> |
| CdSe@ZnS quantum dots and carbon dots          | 0.2-2 µM      | 100 nM       | S <sup>3</sup> |
| Carbon dots-labeled oligodeoxyribonucleotide   | 0.005-0.2 µM  | 2.6 nM       | S <sup>4</sup> |
| Quantum dots/DNA/gold nanoparticles            | 0.002-0.06 µM | 2 nM         | S <sup>5</sup> |
| Colorimetric gold nanoparticles on paper-based | 0.025-0.75 µM | 50 nM        | S <sup>6</sup> |
| Thymine-modified carbon dots                   | 0.03-8 µM     | 0.93 nM      | This work      |

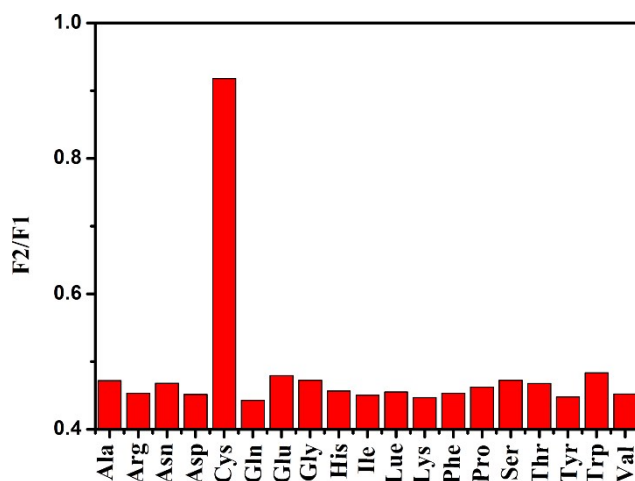

**Fig. S5.** Fluorescence change of CDs-T/Hg<sup>2+</sup> in the presence of various amino acids with a concentration of 10  $\mu$ M. ( $\lambda_{\text{ex}}=360$  nm,  $\lambda_{\text{em}}=450$  nm).

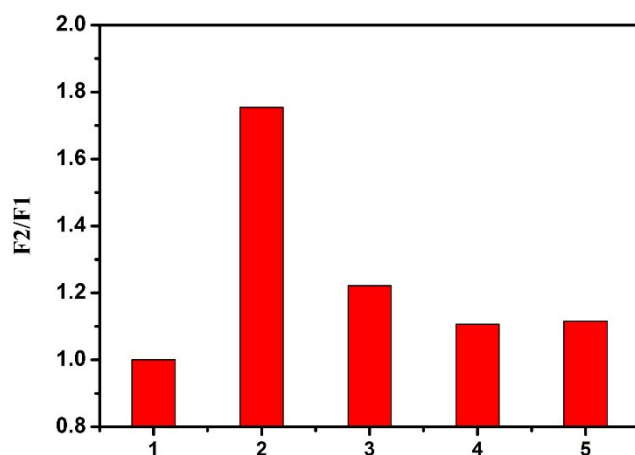

**Fig. S6.** Fluorescence change of CDs-T/Hg<sup>2+</sup> in the absence and presence of various biothiols with a concentration of 10  $\mu$ M. ( $\lambda_{\text{ex}}=360$  nm,  $\lambda_{\text{em}}=450$  nm). 1-CDs-T/Hg<sup>2+</sup>, 2-CDs-T/Hg<sup>2+</sup> + L-Cys, 3-CDs-T/Hg<sup>2+</sup> + GSH, 4-CDs-T/Hg<sup>2+</sup> + cysteamine, 5-CDs-T/Hg<sup>2+</sup> + mercaptoacetic acid.

**Table S2.** Comparison of different nanoparticles-based methods for the detection of L-Cys.

| Method                                                     | Linear range      | Detect limit | Reference       |
|------------------------------------------------------------|-------------------|--------------|-----------------|
| Carbon nanodots                                            | 0.01-5 $\mu$ M    | 4.9 nM       | S <sup>2</sup>  |
| Oligonucleotide-stabilized fluorescent silver nanoclusters | 0.008-0.1 $\mu$ M | 4 nM         | S <sup>7</sup>  |
| Conducting polymers/gold nanoparticles                     | 0.5-200 $\mu$ M   | 50 nM        | S <sup>8</sup>  |
| Cellulose polyampholyte-gold nanoparticles                 | 0.1-10 $\mu$ M    | 20 nM        | S <sup>9</sup>  |
| Graphene quantum dots                                      | 0.01-0.6 $\mu$ M  | 4.5 nM       | S <sup>10</sup> |
| Thymine-modified carbon dots                               | 0.003-7 $\mu$ M   | 0.88 nM      | This work       |

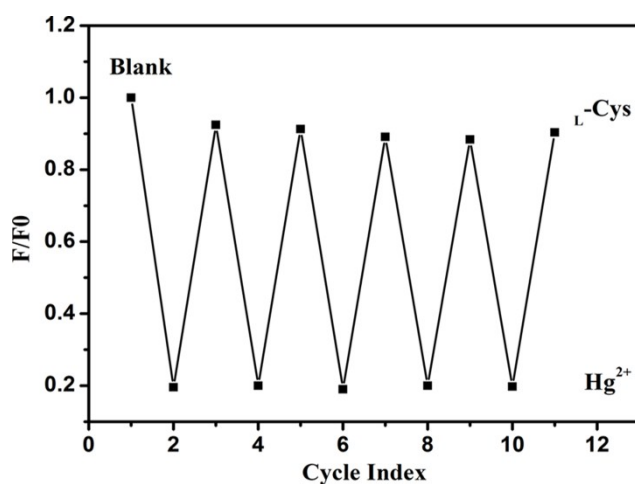

Fig. S7 Reversibility of CDs-T for Hg<sup>2+</sup> and L-Cys

## References

1. Y. Xu, L. Deng, H. Wang, X. Ouyang, J. Zheng, J. Li and R. Yang, *Chem. Commun.*, 2011, 47, 6039-6041.
2. L. Zhou, Y. Lin, Z. Huang, J. Ren and X. Qu, *Chem. Commun.*, 2012, 48, 1147-1149.
3. B. Cao, C. Yuan, B. Liu, C. Jiang, G. Guan and M.-Y. Han, *Analytica chimica acta*, 2013, 786, 146-152.
4. X. Cui, L. Zhu, J. Wu, Y. Hou, P. Wang, Z. Wang and M. Yang, *Biosens. Bioelectron.*, 2015, 63, 506-512.
5. M. Li, Q. Wang, X. Shi, L. A. Hornak and N. Wu, *Anal. Chem.*, 2011, 83, 7061-7065.
6. G.H. Chen, W.Y. Chen, Y.C. Yen, C.W. Wang, H.T. Chang and C.F. Chen, *Anal. Chem.*, 2014, 86, 6843-6849.
7. B. Han and E. Wang, *Biosens. Bioelectron.*, 2011, 26, 2585-2589.
8. Y.P. Hsiao, W.Y. Su, J.R. Cheng and S.H. Cheng, *Electrochimica Acta*, 2011, 56, 6887-6895.
9. J. You, H. Hu, J. Zhou, L. Zhang, Y. Zhang and T. Kondo, *Langmuir*, 2013, 29, 5085-5092.
10. Z. Li, Y. Wang, Y. Ni and S. Kokot, *Sensors and Actuators B: Chemical*, 2015, 207, Part A, 490-497.
